# Supplementary material for: Efficient separation of aristolochic acid I from Caulis aristolochiae manshuriensis (Guan-mu-tong) with copper mediated magnetic molecularly imprinted polymer
Source: Royal Society of Chemistry journal article supplement (doi:10.1039/d3ay00920c), 2023-01-01
Supplement: d3ay00920c1.pdf [file d3ay00920c1.pdf]

1  
2  
3  
4  
5  
6  
7  
8  
9  
10  
11  
12  
13  
14  
15

## Supplementary Information

### **Efficient separation of Aristolochic acid I from *Caulis aristolochiae manshuriensis* (Guan-mu-tong) with copper mediated magnetic molecularly imprinted polymer**

Yu Cao, Haizhu Shi, Zhuo Lan, Kunlin He, Qian Chen, Chungu Zhang, Shun Feng\*, Lianhai Shan\*

Sichuan Engineering Research Center for Biomimetic Synthesis of Natural Drugs, School of Life Science and Engineering, Southwest Jiaotong University, Chengdu 610031, China.

\*Corresponding Author

Orcid.org/0000-0003-1602-0244; Phone: +86 028 87634296;

E-mail: fengshunxd@hotmail.com

E-mail: mas3330@swjtu.edu.cn

## 16 **1 EXPERIMENTAL SECTION**

### 17 **1.1 Preparation of Fe<sub>3</sub>O<sub>4</sub> nanoparticles**

18 Fe<sub>3</sub>O<sub>4</sub> nanoparticles are synthesized by an improved chemical co-precipitation method. In brief, 1.53  
19 g FeCl<sub>3</sub>·6H<sub>2</sub>O and 0.75 g FeCl<sub>2</sub>·4H<sub>2</sub>O were added in a 100 mL three-mouth flask containing 50 mL  
20 water under a nitrogen atmosphere and vigorous stirring. After being heated to 80 C, 5 mL of  
21 ammonia solution was added rapidly with a syringe. After 30 min of mechanical stirring, those formed  
22 black precipitates were collected with an external magnet, followed by washing with ethanol and  
23 ultra-pure water 3 times. The product was dried in a vacuum freezer for 12 h.

### 24 **1.2 Determination of Cu(II) in obtained AAI by ICP-MS**

25 An aliquot of 2 mg AAI obtained in Section 3.5 was dissolved in 10 mL superior pure nitric acid.  
26 And then the solution was heated to 120°C until almost dried. And then deionized water was added  
27 to a final volume of 25 mL, and analyzed by IPC-MS (Thermo Scientific iCAP TQs ICP-MS, US).

### 28 **1.3 The stability of NPs in pH 2 solution**

29 To further investigate the stability of NPs, an amount of 10 mg Fe<sub>3</sub>O<sub>4</sub> or Cu-mMIP was immersed in  
30 0.01 mol L<sup>-1</sup> HCl solution (pH 2) under shaking. After certain intervals, the color of the solution was  
31 recorded by a camera, the particle size was measured by a zeta potential meter (UK, Malvern Nano-  
32 Zen 3600), and the magnetic respond of NPs were tested.

34 **Figure captions**

35 Fig. S1 Chemical structures of AAI, enalapril, norfloxacin, lappaconitine, 3,5-dinitrobenzoic acid,  
36 benzoic acid, 4-nitrobenzoic acid, 4-hydroxybenzoic acid and 4-aminobenzoic acid.

37 Fig. S2 Optimized preparation conditions for metal ion (a); UV-Vis spectra of AAI with different  
38 functional monomers (b); ratio between AAI and TEOS (c); solvent (d); and pH (e)

39 Fig. S3 FT-IR spectra of  $\text{Fe}_3\text{O}_4$ , mNIP, mMIP, Cu-mMIP, Cu-mMIP-AAI and AAI.

40 Fig. S4 Pseudo-first-order (a) and pseudo-second-order (b) kinetic models of Cu-mMIP, mMIP and  
41 mNIP.

42 Fig. S5 Scatchard curves of Cu-mMIP (a); mMIP(b); mNIP(c).

43 Fig. S6  $\text{Fe}_3\text{O}_4$  or Cu-mMIP solution (a), particle size of  $\text{Fe}_3\text{O}_4$  (b) and Cu-mMIP (c) recorded after  
44 being immersed in pH 2 solution 0 h, 12 h, and 24 h

45 Fig. S7 Typical chromatograms of the solutions before/after being treated with Cu-mMIP at 1<sup>st</sup> (a),  
46 2<sup>nd</sup> (b), 3<sup>rd</sup> (c), 4<sup>th</sup> (d), 5<sup>th</sup> (e), and 6<sup>th</sup> (f) cycle, respectively.

47 Fig. S8 Typical chromatograms of AAI standard (a) and Guan-mu-tong extract (b).

48 **Table captions**

49 Table S1 Kinetic constants for the Cu-mMIP, mMIP and mNIP

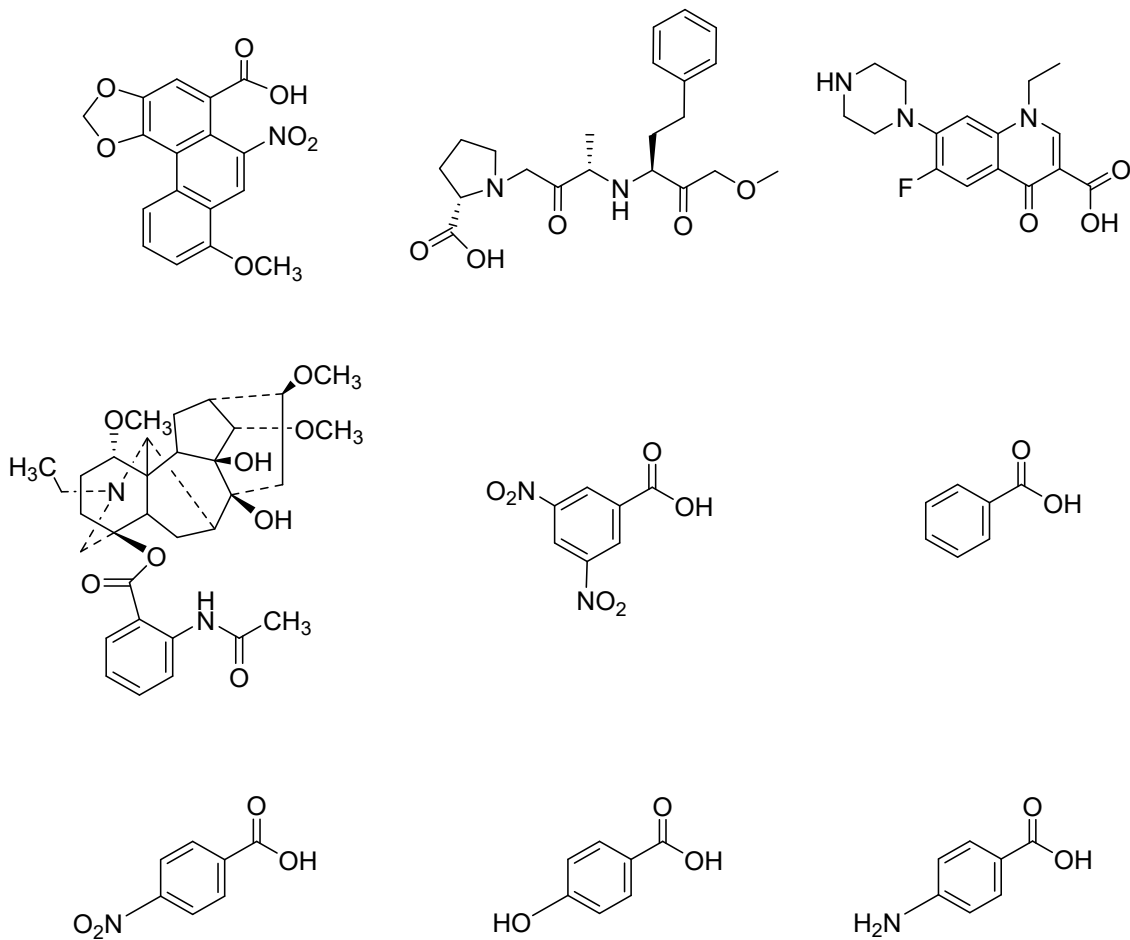

51

52

53

**Figure S1**

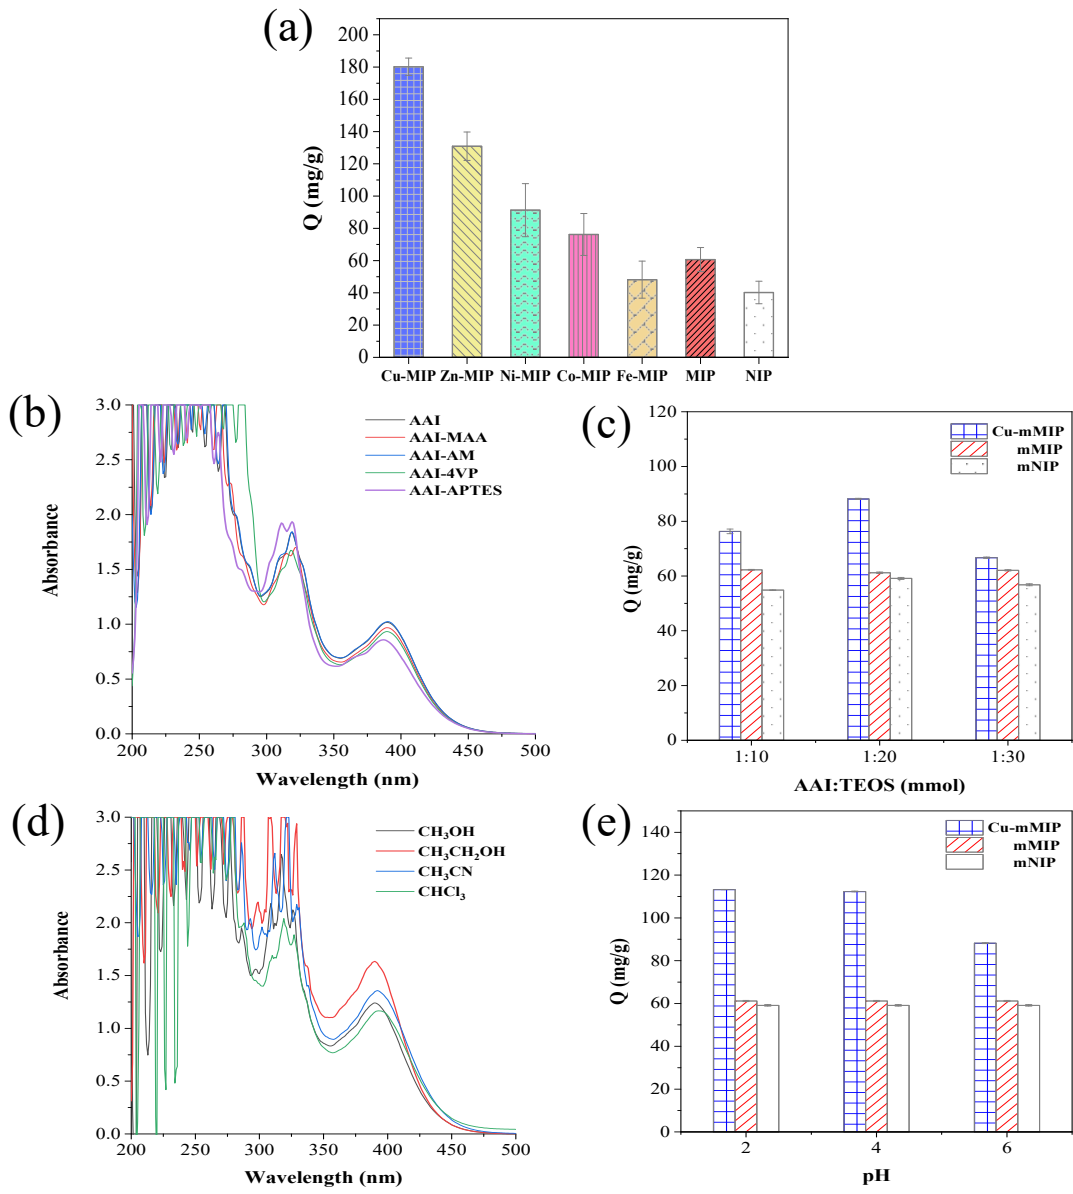

54

55

Figure S2

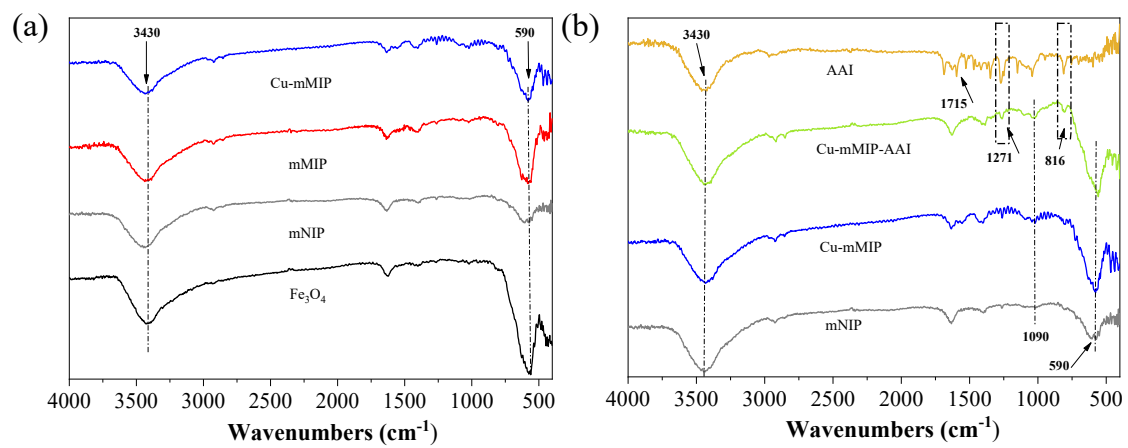**Figure S3**

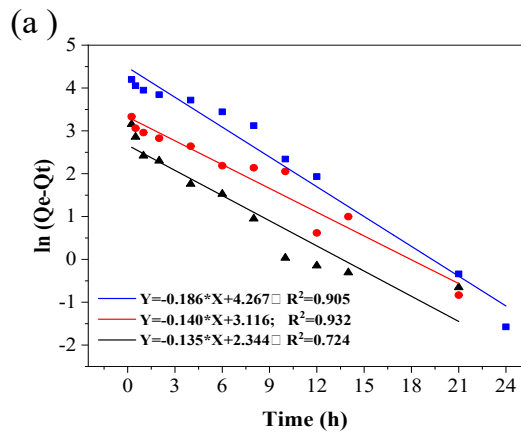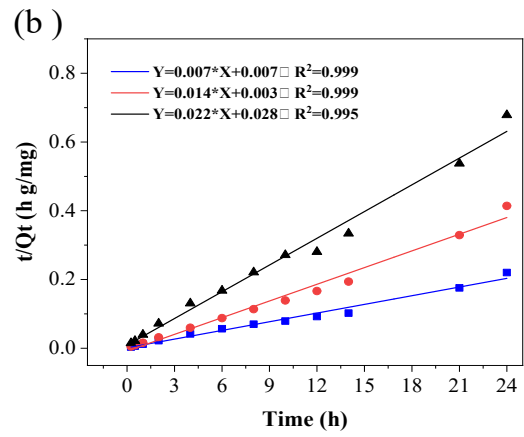

59

60

Figure S4

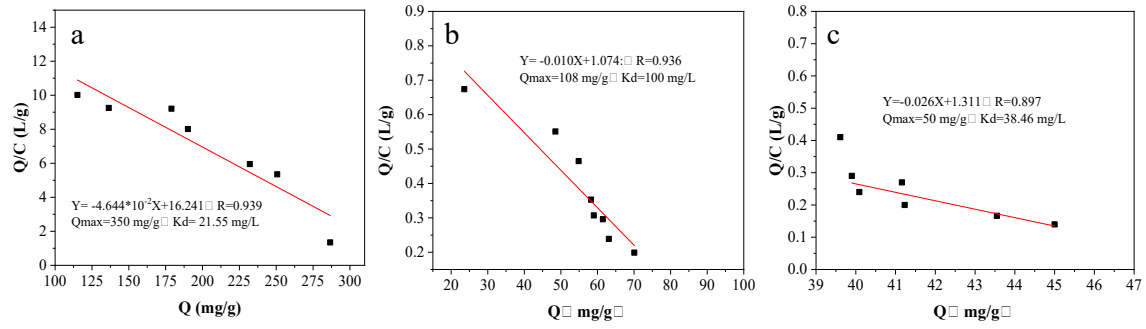

61

62

63

Figure S5



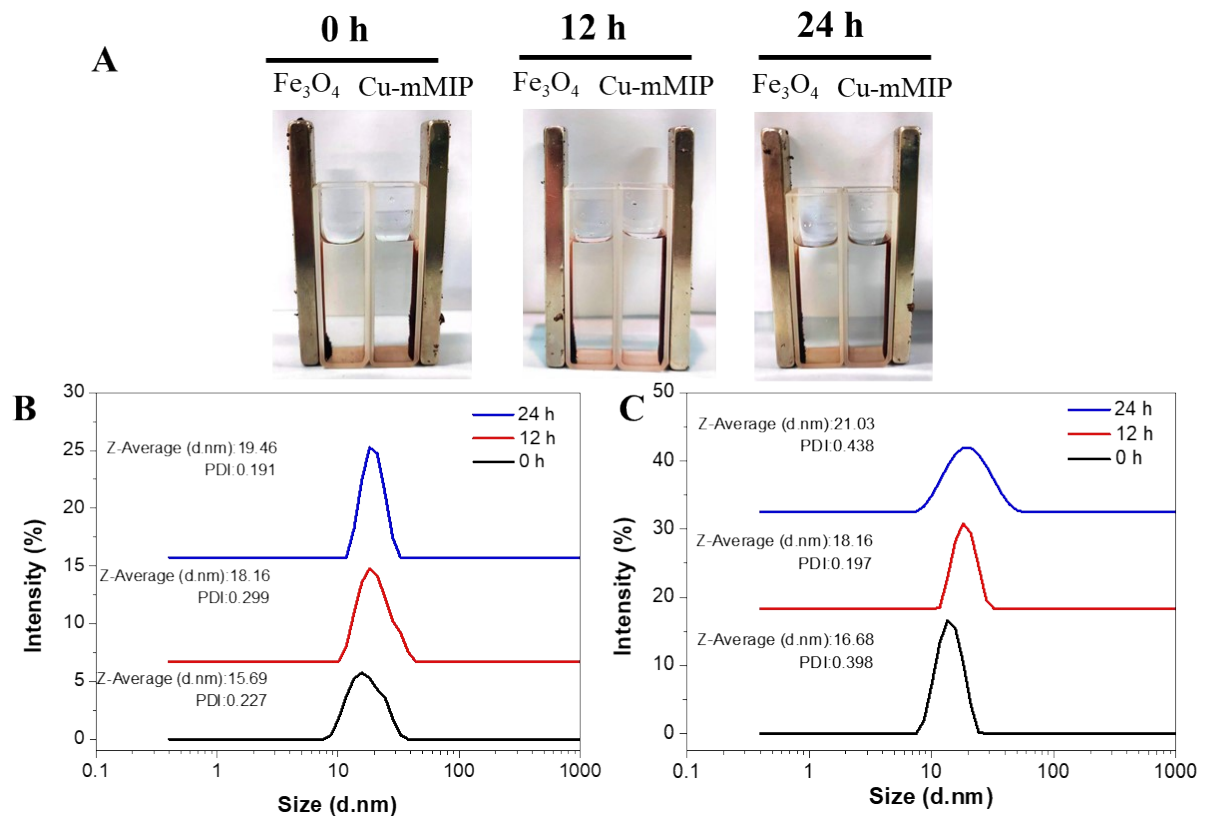

64

65

**Figure S6**

66

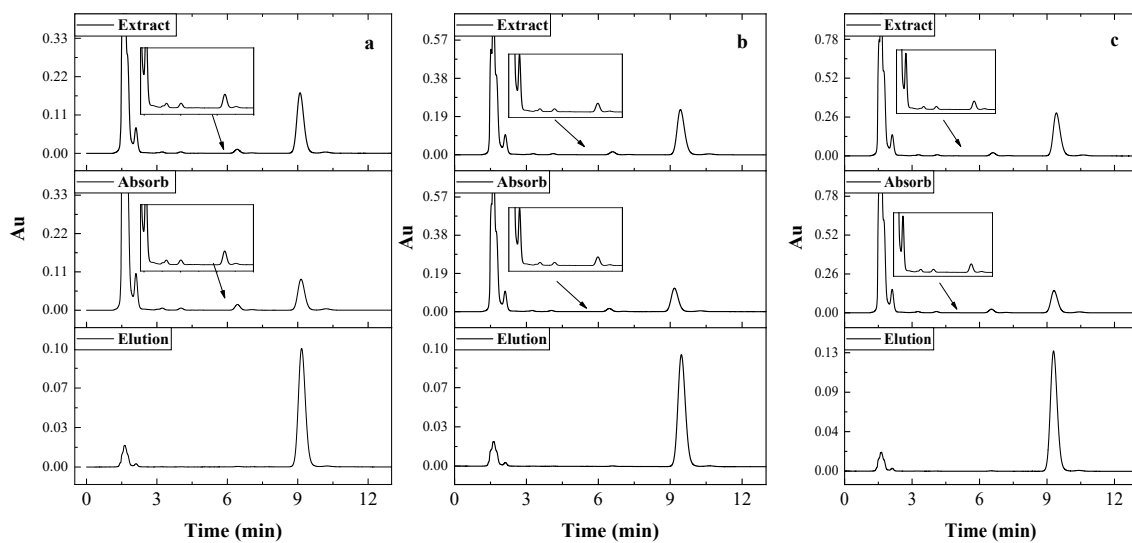

67

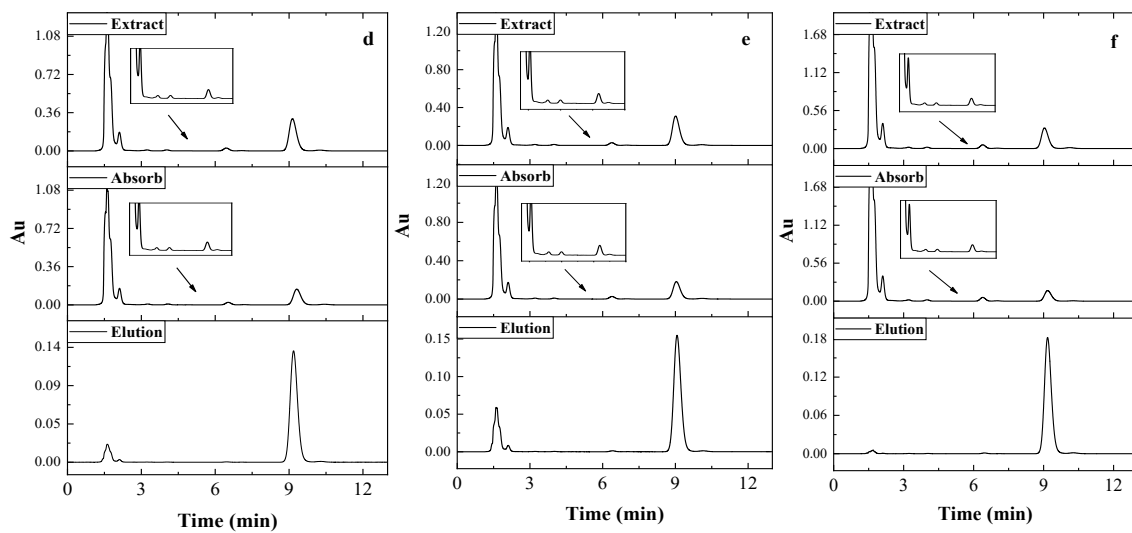

68

69

Figure S7

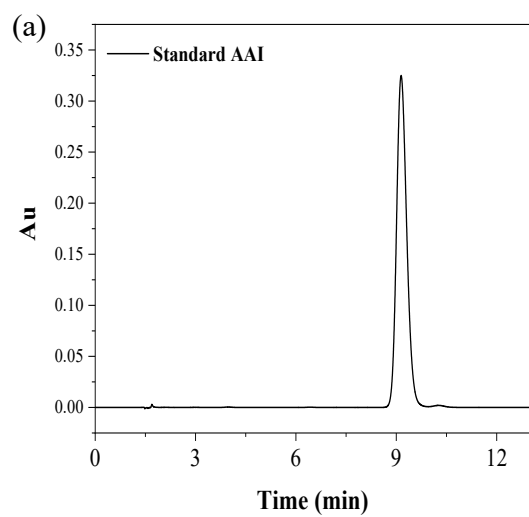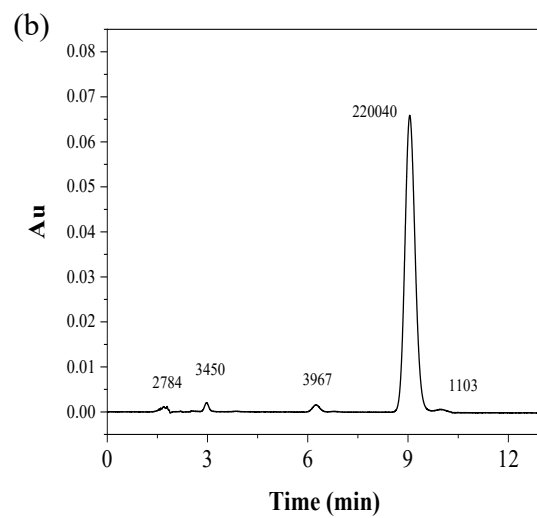

70  
71

Figure S8

**Table S1.** Kinetic constants for the Cu-mMIP, mMIP and mNIP

| Sorbents | Pseudo-first-order |                       |                       | Pseudo-second-order |                           |
|----------|--------------------|-----------------------|-----------------------|---------------------|---------------------------|
|          | R <sup>2</sup>     | K <sub>1</sub>        | Q <sub>e</sub>        | R <sup>2</sup>      | K <sub>2</sub>            |
|          |                    | (mL h <sup>-1</sup> ) | (mg g <sup>-1</sup> ) |                     | (g (mg h <sup>-1</sup> )) |
| Cu-mMIP  | 0.905              | 0.186                 | 136.96                | 0.999               | 0.007                     |
| mMIP     | 0.932              | 0.140                 | 72.95                 | 0.999               | 0.013                     |
| mNIP     | 0.742              | 0.135                 | 44.65                 | 0.995               | 0.018                     |
